# Supplementary material for: Efficient Combination of Carbon Quantum Dots and BiVO4 for Significantly Enhanced Photocatalytic Activities
Source: MDPI journal article supplement (doi:10.3390/catal13030463), 2023-02-22
Supplement: s1 [file s1]

---

## Supplementary materials

# Efficient combination of carbon quantum dots and BiVO<sub>4</sub> for significantly enhanced photocatalytic activities

Chenyan Hu <sup>1,†</sup>, Qingdi Chen <sup>1,†</sup>, Maosheng Tian <sup>1</sup>, Weiwen Wang<sup>2</sup>, Junxia Yu <sup>1</sup> and Lianguo Chen <sup>3,\*</sup>

<sup>1</sup> School of Chemistry and Environmental Engineering, Wuhan Institute of Technology, Wuhan 430072, China

<sup>2</sup> Institute for Environmental and Climate Research, Jinan University, Guangzhou, 511443, China

<sup>3</sup> State Key Laboratory of Freshwater Ecology and Biotechnology, Institute of Hydrobiology, Chinese Academy of Sciences, Wuhan 430072, China

**\* Corresponding author:**

Dr. Lianguo CHEN

Tel: +86 27 68780042

Fax: +86 27 68780123

E-mail: lchenam@ihb.ac.cn

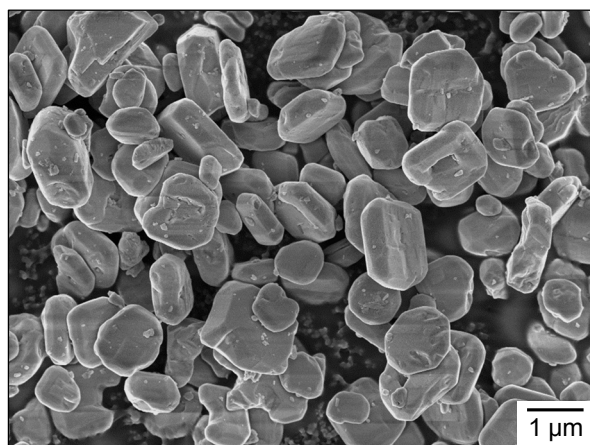

**Figure S1.** FESEM image of  $\text{BiVO}_4$ .

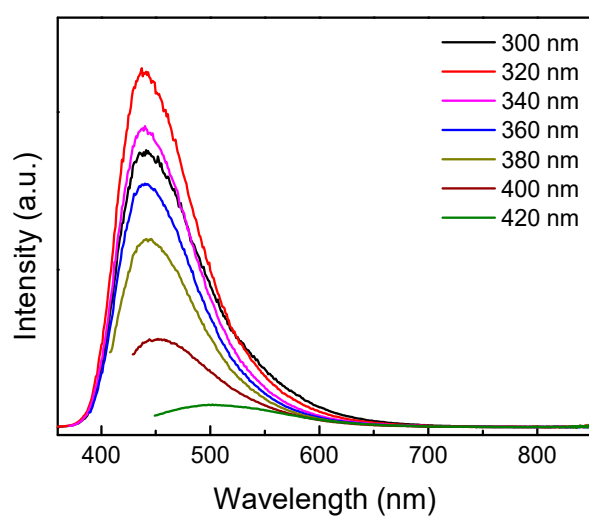

**Figure S2.** PL spectra of CQDs solution at different excitation wavelength.

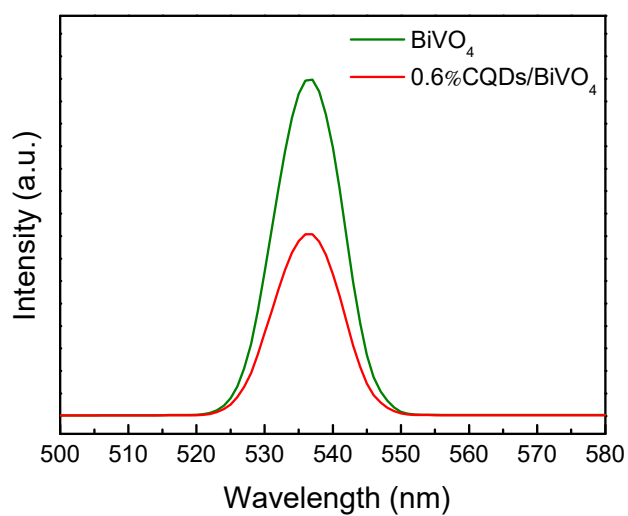

**Figure S3.** PL spectra of  $\text{BiVO}_4$  and 0.6% CQDs/ $\text{BiVO}_4$ .

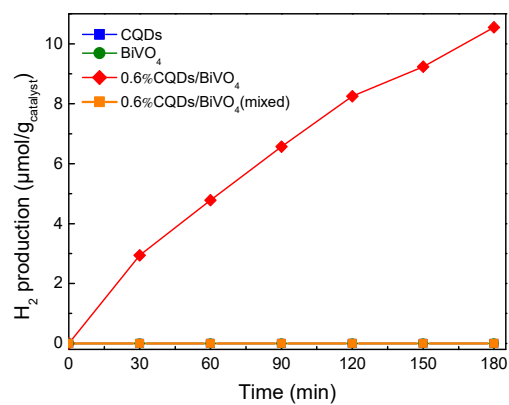

**Figure S4.** Photocatalytic H<sub>2</sub> evolution of CQDs, BiVO<sub>4</sub>, 0.6%CQDs/BiVO<sub>4</sub>, and 0.6%CQDs/BiVO<sub>4</sub>(mixed).
